# Supplementary material
Source: PubMed Central journal article supplement (PMC4908815)
Supplement: NIHMS792369-supplement-Supplementary_Table_1.pdf [file NIHMS792369-supplement-Supplementary_Table_1.pdf]

**Supplementary Table 1. Disease flares and chronic damage in patients with AAV according to serological and clinicopathological classifications<sup>1</sup>**

|                                                                  | PR3-AAV<br>(n = 131) | MPO-AAV<br>(n = 66) | P    | GPA<br>(n = 148) | MPA<br>(n = 48) | P-value |
|------------------------------------------------------------------|----------------------|---------------------|------|------------------|-----------------|---------|
| Number of subjects with at least 1 severe flare by 18 months (%) | 33 (25.2)            | 8 (12.1)            | 0.03 | 36 (24.5)        | 5 (10.4)        | 0.04    |
| Number of subjects with $\geq 1$ limited flare by 18 months (%)  | 41 (31.3)            | 10 (15.2)           | 0.02 | 45 (30.6)        | 6 (12.5)        | 0.01    |
| Time to first flare (days), median (IQR)                         | 153 (92; 200)        | 161 (38; 280)       | 0.82 | 148 (92; 199)    | 257 (136; 281)  | 0.30    |
| VDI by 18 months                                                 | 2.2 (2.0)            | 2.5 (2.3)           | 0.02 | 2.2 (2.1)        | 2.6 (2.2)       | <0.01   |

<sup>1</sup>One patient had an indeterminate type of AAV. AAV = ANCA-associated vasculitis; IQR = interquartile range; VDI = vasculitis damage index; SD = standard deviation
