# Supplementary material
Source: PubMed Central journal article supplement (PMC4908815)
Supplement: NIHMS792369-supplement-Supplementary_Table_2.pdf [file NIHMS792369-supplement-Supplementary_Table_2.pdf]

**Supplementary Table 2. Cumulative glucocorticoid use in patients with AAV according to serological and clinicopathological classifications <sup>1,2</sup>**

|                  | MPO-AAV <sup>3</sup> |                |          | PR3-AAV <sup>4</sup> |                |          | p    | MPA <sup>5</sup> |                |          | GPA <sup>6</sup> |                |          | p    |
|------------------|----------------------|----------------|----------|----------------------|----------------|----------|------|------------------|----------------|----------|------------------|----------------|----------|------|
|                  | (n = 66)             |                |          | (n = 131)            |                |          |      | (n = 48)         |                |          | (n = 148)        |                |          |      |
| <b>6 months</b>  | 3.90                 |                |          | 4.10                 |                |          | 0.60 | 3.90             |                |          | 4.10             |                |          | 0.86 |
|                  | <b>RTX</b>           | <b>CYC/AZA</b> | <b>p</b> | <b>RTX</b>           | <b>CYC/AZA</b> | <b>p</b> |      | <b>RTX</b>       | <b>CYC/AZA</b> | <b>p</b> | <b>RTX</b>       | <b>CYC/AZA</b> | <b>p</b> |      |
|                  | 3.70                 | 4.10           | 0.30     | 4.00                 | 4.30           | 0.22     |      | 3.70             | 4.00           | 0.47     | 3.90             | 4.30           | 0.17     |      |
| <b>12 months</b> | 4.00                 |                |          | 4.30                 |                |          | 0.33 | 4.00             |                |          | 4.30             |                |          | 0.50 |
|                  | <b>RTX</b>           | <b>CYC/AZA</b> | <b>p</b> | <b>RTX</b>           | <b>CYC/AZA</b> | <b>p</b> |      | <b>RTX</b>       | <b>CYC/AZA</b> | <b>p</b> | <b>RTX</b>       | <b>CYC/AZA</b> | <b>p</b> |      |
|                  | 3.80                 | 4.20           | 0.48     | 4.10                 | 4.40           | 0.04     |      | 3.70             | 4.10           | 0.41     | 4.00             | 4.40           | 0.05     |      |
| <b>18 months</b> | 4.00                 |                |          | 4.60                 |                |          | 0.10 | 4.00             |                |          | 4.50             |                |          | 0.19 |
|                  | <b>RTX</b>           | <b>CYC/AZA</b> | <b>p</b> | <b>RTX</b>           | <b>CYC/AZA</b> | <b>p</b> |      | <b>RTX</b>       | <b>CYC/AZA</b> | <b>p</b> | <b>RTX</b>       | <b>CYC/AZA</b> | <b>p</b> |      |
|                  | 3.80                 | 4.20           | 0.30     | 4.60                 | 4.70           | 0.50     |      | 3.80             | 4.10           | 0.56     | 4.40             | 4.70           | 0.31     |      |

<sup>1</sup> Values represent the median dose of prednisone in grams. <sup>2</sup> One patient had an indeterminate type of AAV. <sup>3</sup> RTX-treated MPO-AAV patients, n = 33;

CYC/AZA-treated MPO-AAV patients, n = 33. <sup>4</sup> RTX-treated PR3-AAV patients, n = 66; CYC/AZA-treated PR3-AAV patients, n = 65. <sup>5</sup> RTX-treated MPA

patients, n = 24; CYC/AZA-treated MPA patients, n = 24. <sup>6</sup> RTX-treated GPA patients, n = 74; CYC/AZA-treated GPA patients, n = 74

AAV = ANCA-associated vasculitis; GPA = granulomatous polyangiitis; MPA = microscopic polyangiitis; RTX = rituximab; CYC = cyclophosphamide; AZA = azathioprine
